# Supplementary material for: Impact of PET acquisition durations on image quality and lesion detectability in whole-body 68Ga-PSMA PET-MRI
Source: EJNMMI Res. 2017 Feb 6;7:12. doi: 10.1186/s13550-017-0261-8 (PMC5293699; doi:10.1186/s13550-017-0261-8)
Supplement: Additional file 1: — Halo scores for different acquisition durations and PET reconstructions. (ODS 10 kb) [file 13550_2017_261_MOESM1_ESM.ods]

## Sheet: Tabelle1
Halo Scores
0: no halo artefact; 1: halo around either kidneys or bladder; 2: halo around both kidneys and bladder
Patient ID	300s	180s (+native AM)	90s (+native AM)	30s (+native AM)	180s (+300s AM)	90s (+300s AM)	30s (+300s AM)	300s (+180s AM)	300s (+90s AM)	300s (+30s AM)	300s (+ native AM,+PGC)	180s (+native AM,+PGC)	90s (+native AM,+PGC)	30s (+native AM,+PGC)
PSMA_002	0	0	0	1	0	0	0	0	0	1	0	0	0	1
PSMA_003	0	0	2	1	0	0	0	0	2	1	0	0	2	1
PSMA_004	0	0	0	0	0	0	0	0	0	0	0	0	0	0
PSMA_005	0	0	2	2	0	0	0	0	2	2	0	0	2	1
PSMA_006	1	1	2	2	1	1	1	1	2	2	1	1	2	1
PSMA_007	1	1	2	2	1	1	1	1	2	2	1	1	2	1
PSMA_008	0	0	2	2	0	0	0	0	2	2	0	0	2	2
PSMA_009	1	1	2	2	1	1	0	1	2	2	1	1	2	2
PSMA_010	0	1	2	2	0	0	0	1	2	2	0	1	2	2
PSMA_011	0	0	2	2	0	0	0	0	2	2	0	0	2	2
PSMA_012	2	2	2	2	2	2	2	2	2	2	2	2	2	0
PSMA_013	1	2	2	2	1	1	1	2	2	2	1	2	2	2
