# Supplementary material for: Impact of PET acquisition durations on image quality and lesion detectability in whole-body 68Ga-PSMA PET-MRI
Source: EJNMMI Res. 2017 Feb 6;7:12. doi: 10.1186/s13550-017-0261-8 (PMC5293699; doi:10.1186/s13550-017-0261-8)
Supplement: Additional file 2: — Lesion detectabilities for different acquisition durations and PET reconstructions. (ODS 13 kb) [file 13550_2017_261_MOESM2_ESM.ods]

## Sheet: Tabelle1
Detectability Scores
0: not detectable; 1: equivocal; 2: discernible; 3: clearly visible
Patient ID	Lesion ID	300s	180s (+native AM)	90s (+native AM)	30s (+native AM)	180s (+300s AM)	90s (+300s AM)	30s (+300s AM)	300s (w/o SC)	180s (+native AM, w/o SC)	90s (+native AM, w/o SC)	30s (+native AM, w/o SC)	180s (+300s AM, w/o SC)	90s (+300s AM, w/o SC)	30s (+300s AM, w/o SC)
PSMA_002	1	3	3	3	3	3	3	3	3	3	2	1	3	2	1
	2	3	3	3	2	3	3	2	3	3	3	1	3	3	1
	3	3	3	3	3	3	3	3	3	3	3	3	3	3	3
	4	3	3	3	3	3	3	3	3	3	3	2	3	3	2
	5	3	3	3	1	3	3	2	3	3	2	2	3	2	2
	6	3	3	3	1	3	3	1	3	3	2	1	3	2	1
	7	3	3	3	2	3	3	2	3	3	3	2	3	3	2
	8	2	2	2	0	2	2	0	3	3	3	0	3	3	0
	9	2	2	2	1	2	2	2	2	2	2	1	2	2	1
	10	2	2	1	0	2	1	0	2	2	1	0	2	1	0
	11	3	3	3	2	3	3	2	3	3	3	1	3	3	1
	12	3	3	2	1	3	2	1	3	3	2	1	3	2	1
	13	3	3	3	2	3	3	2	3	3	3	2	3	3	2
	14	3	3	3	3	3	3	3	3	3	3	2	3	3	2
PSMA_003	1	3	3	0	1	3	2	1	3	3	1	0	3	1	0
	2	3	3	2	1	3	3	1	3	3	2	0	3	2	0
PSMA_004	1	3	3	3	0	3	3	0	3	3	2	0	3	2	0
	2	3	3	3	2	3	3	2	3	3	3	0	3	3	0
	3	3	3	3	2	3	3	2	3	3	3	1	3	3	1
	4	3	3	2	1	3	2	0	3	3	1	0	3	1	0
PSMA_005	1	3	3	3	3	3	3	2	3	3	3	2	3	3	2
	2	3	3	3	3	3	3	3	3	3	3	3	3	3	3
	3	3	3	3	3	3	3	2	3	3	3	3	3	3	3
	4	3	3	3	3	3	3	3	3	3	3	3	3	3	3
	5	3	3	3	3	3	3	2	3	3	3	3	3	3	3
	6	3	3	3	3	3	3	3	3	3	3	3	3	3	3
	7	3	3	0	0	3	3	3	3	3	3	3	3	3	3
PSMA_006	1	3	3	2	1	3	2	1	3	2	2	0	2	2	0
PSMA_007	1	3	3	3	3	3	3	3	3	3	3	3	3	3	3
	2	3	3	3	3	3	3	3	3	3	3	3	3	3	3
	3	3	3	3	3	3	3	3	3	3	3	3	3	3	3
	4	3	3	3	3	3	3	3	3	3	3	3	3	3	3
	5	3	3	3	3	3	3	3	3	3	3	3	3	3	3
	6	3	3	3	3	3	3	3	3	3	3	3	3	3	3
	7	3	3	3	3	3	3	3	3	3	3	3	3	3	3
	8	3	3	3	3	3	3	3	3	3	3	3	3	3	3
	9	3	3	3	3	3	3	3	3	3	3	3	3	3	3
	10	3	3	3	3	3	3	3	3	3	3	3	3	3	3
	11	3	3	3	3	3	3	3	3	3	3	3	3	3	3
	12	3	3	3	3	3	3	3	3	3	3	3	3	3	3
	13	3	3	3	3	3	3	3	3	3	3	3	3	3	3
	14	3	3	3	3	3	3	3	3	3	3	3	3	3	3
	15	3	3	3	3	3	3	3	3	3	3	3	3	3	3
	16	3	3	3	3	3	3	3	3	3	3	3	3	3	3
	17	3	3	3	3	3	3	3	3	3	3	3	3	3	3
	18	3	3	3	3	3	3	3	3	3	3	3	3	3	3
	19	3	3	3	3	3	3	3	3	3	3	3	3	3	3
	20	3	3	3	3	3	3	3	3	3	3	3	3	3	3
	21	3	3	3	3	3	3	3	3	3	3	3	3	3	3
	22	3	3	3	1	3	3	1	3	3	2	1	3	2	1
	23	3	3	3	3	3	3	3	3	3	3	3	3	3	3
	24	3	3	0	0	3	2	1	2	1	1	0	1	1	0
	25	3	3	0	0	3	2	1	2	2	0	0	2	0	0
PSMA_008	1	3	3	0	0	3	3	2	3	3	2	1	3	2	1
PSMA_009	1	2	2	2	1	2	2	1	3	3	3	1	3	3	1
	2	3	2	2	1	2	2	1	3	3	2	0	3	2	0
	3	3	3	3	3	3	3	3	3	3	3	3	3	3	3
	4	3	3	3	3	3	3	3	3	3	3	2	3	3	2
	5	3	3	3	3	3	3	3	3	3	3	3	3	3	3
	6	3	3	3	0	3	3	1	3	3	3	0	3	3	0
	7	3	3	3	3	3	3	3	3	3	3	3	3	3	3
	8	3	3	3	1	3	3	2	3	3	3	1	3	3	1
	9	3	3	3	3	3	3	3	3	3	3	3	3	3	3
	10	3	3	3	3	3	3	3	3	3	3	3	3	3	3
	11	3	2	0	0	3	0	0	3	3	0	0	3	0	0
	12	3	3	3	3	3	3	3	3	3	3	2	3	3	2
	13	3	3	3	3	3	3	3	3	3	3	2	3	3	2
	14	3	3	3	3	3	3	3	3	3	3	2	3	3	2
	15	3	3	3	3	3	3	3	3	3	2	1	3	2	1
	16	3	3	0	0	3	3	2	3	3	3	1	3	3	1
	17	3	3	3	2	3	3	2	3	3	3	1	3	3	1
	18	3	3	3	2	3	3	2	3	3	3	1	3	3	1
	19	3	3	3	3	3	3	3	3	3	3	3	3	3	3
	20	3	3	3	3	3	3	3	3	3	3	3	3	3	3
	21	3	3	2	0	3	2	0	3	3	1	0	3	1	0
	22	3	3	3	3	3	3	3	3	3	3	2	3	3	2
	23	3	3	3	3	3	3	3	3	3	3	2	3	3	2
	24	3	3	0	0	3	3	3	3	3	3	2	3	3	2
	25	3	3	2	1	3	3	3	3	3	3	2	3	3	2
PSMA_010	1	3	2	1	0	2	1	0	3	3	1	0	3	1	0
	2	2	2	1	0	2	1	0	2	2	1	0	2	1	0
	3	3	3	3	2	3	3	2	3	3	3	1	3	3	1
	4	3	3	3	1	3	3	1	3	3	3	0	3	3	0
	5	3	3	2	1	3	2	1	3	3	2	1	3	2	1
	6	3	3	2	0	3	2	0	3	3	1	0	3	1	0
	7	3	3	3	1	3	3	1	3	3	2	1	3	2	1
	8	3	3	3	0	3	3	0	2	2	2	0	2	2	0
	9	3	3	3	2	3	3	2	3	3	3	2	3	3	2
	10	3	3	3	2	3	3	2	3	3	2	2	3	2	2
	11	3	3	3	2	3	3	2	3	3	3	2	3	3	2
	12	3	3	3	2	3	3	2	3	3	3	2	3	3	2
	13	3	3	3	3	3	3	3	3	3	3	3	3	3	3
	14	3	3	3	1	3	3	1	3	3	2	1	3	2	1
	15	3	3	2	0	3	2	0	3	3	1	0	3	1	0
	16	3	2	1	0	2	1	0	3	2	1	0	2	1	0
	17	3	3	3	3	3	3	3	3	3	3	3	3	3	3
	18	3	2	0	0	2	1	0	3	3	1	0	3	1	0
	19	3	3	3	1	3	3	2	3	3	3	0	3	3	0
	20	3	3	0	0	3	2	0	3	3	1	0	3	1	0
	21	3	3	3	2	3	3	2	3	3	3	1	3	3	1
	22	3	3	3	3	3	3	3	3	3	3	2	3	3	2
	23	3	2	0	0	2	2	1	3	3	1	0	3	1	0
	24	3	3	3	1	3	3	1	3	3	3	1	3	3	1
	25	3	3	3	3	3	3	3	3	3	3	3	3	3	3
	26	3	3	3	3	3	3	2	3	3	3	1	3	3	1
	27	3	3	3	3	3	3	3	3	3	3	3	3	3	3
	28	3	3	3	3	3	3	3	3	3	3	3	3	3	3
	29	3	2	0	0	2	1	0	2	1	1	0	1	1	0
	30	3	3	0	0	3	2	0	3	2	2	0	2	2	0
	31	3	3	1	0	3	3	3	3	3	3	2	3	3	2
	32	3	2	0	0	2	2	1	3	2	2	1	2	2	1
	33	3	3	0	0	3	2	0	3	2	1	0	2	1	0
	34	3	3	0	0	3	3	3	3	3	3	3	3	3	3
	35	3	3	1	1	3	3	3	3	3	3	3	3	3	3
	36	3	3	0	0	3	3	2	3	3	3	2	3	3	2
PSMA_011	1	2	2	1	0	2	1	0	2	2	0	0	2	0	0
	2	3	3	3	3	3	3	3	3	3	3	2	3	3	2
	3	3	3	2	0	3	2	0	3	3	2	0	3	2	0
	4	3	3	0	0	3	3	1	3	3	3	2	3	3	2
	5	3	3	3	3	3	3	3	3	3	3	3	3	3	3
PSMA_012
PSMA_013	1	3	3	3	1	3	3	1	3	3	3	1	3	3	1
	2	3	3	3	1	3	3	1	3	3	2	1	3	2	1
	3	3	3	3	2	3	3	2	3	3	3	3	3	3	3
	4	3	3	2	0	3	2	0	3	3	2	0	3	2	0
	5	3	3	3	1	3	3	1	3	3	2	1	3	2	1
	6	3	3	2	0	3	2	0	3	3	2	0	3	2	0
	7	3	3	3	1	3	3	1	3	3	3	1	3	3	1
	8	3	3	3	3	3	3	3	3	3	3	3	3	3	3
	9	3	3	3	3	3	3	3	3	3	2	1	3	2	1
	10	3	3	2	0	3	2	0	3	3	2	0	3	2	0
	11	3	3	3	2	3	3	2	3	3	3	2	3	3	2
	12	3	3	3	2	3	3	2	3	3	3	2	3	3	2
	13	3	3	3	1	3	3	1	3	3	3	1	3	3	1
	14	3	2	0	0	2	1	0	2	1	0	0	1	0	0
	15	3	3	3	2	3	3	2	3	3	3	2	3	3	2
	16	3	3	3	2	3	3	2	3	3	3	2	3	3	2
	17	2	1	0	0	2	2	2	2	2	2	2	2	2	2
	18	3	3	1	0	3	2	0	2	2	1	0	2	1	0
	19	3	3	3	2	3	3	2	3	3	3	2	3	3	2
	20	3	3	2	0	3	2	0	2	2	1	0	2	1	0
	21	3	3	2	0	3	2	0	2	2	1	0	2	1	0
