# Supplementary material for: Impact of PET acquisition durations on image quality and lesion detectability in whole-body 68Ga-PSMA PET-MRI
Source: EJNMMI Res. 2017 Feb 6;7:12. doi: 10.1186/s13550-017-0261-8 (PMC5293699; doi:10.1186/s13550-017-0261-8)
Supplement: Additional file 4: — Halo artefact occurrence vs. SUVmean of high-contrast organs. (ODS 10 kb) [file 13550_2017_261_MOESM4_ESM.ods]

## Sheet: Tabelle1
Halo Occurences vs. SUV
0: halo artefact absent; 1: halo artefact present
Patient ID	SUVmean kidney	Halo around kidney	SUVmean bladder	Halo around bladder
PSMA_002	26,6	0	3,4	0
PSMA_003	37,1	0	28,1	0
PSMA_004	45,7	0	34,9	0
PSMA_005	37,2	0	54,9	0
PSMA_006	23	1	30,3	0
PSMA_007	32,1	1	14,1	0
PSMA_008	37,9	0	76,9	0
PSMA_009	38,5	1	36,3	0
PSMA_010	51,2	0	52,3	0
PSMA_011	27,2	0	35,9	0
PSMA_012	30,5	1	34,4	1
PSMA_013	28,5	0	102,4	1
