# Supplementary material for: Impact of PET acquisition durations on image quality and lesion detectability in whole-body 68Ga-PSMA PET-MRI
Source: EJNMMI Res. 2017 Feb 6;7:12. doi: 10.1186/s13550-017-0261-8 (PMC5293699; doi:10.1186/s13550-017-0261-8)
Supplement: Additional file 5: — MLAA-based arm completion for different acquisition durations. (ODS 11 kb) [file 13550_2017_261_MOESM5_ESM.ods]

## Sheet: Tabelle1
MLAA-based arm completion
		Completed arms volume (mL)					Mean VOI attenuation coefficient (1/cm)
Patient ID		300s	180s	90s	30s		300s	180s	90s	30s
PSMA_002		5261	4917	3391	1910		0,083	0,065	0,012	0,001
PSMA_003		4118	3780	1275	2181		0,084	0,071	0,000	0,005
PSMA_004		2634	2606	1969	1859		0,085	0,080	0,010	0,006
PSMA_005		3099	2787	1379	1590		0,085	0,069	0,005	0,000
PSMA_006		4390	3599	1216	1892		0,086	0,040	0,001	0,000
PSMA_007		4948	4185	1439	1956		0,074	0,022	0,000	0,000
PSMA_008		5518	5351	1513	2658		0,079	0,079	0,000	0,000
PSMA_009		7037	6688	1539	2736		0,087	0,077	0,000	0,000
PSMA_010		5761	5401	2890	2235		0,084	0,074	0,001	0,009
PSMA_011		4481	3980	1383	2166		0,084	0,065	0,001	0,000
PSMA_012		4185	2102	1597	2010		0,084	0,015	0,000	0,000
PSMA_013		4342	3910	1348	1470		0,088	0,084	0,000	0,000
